# Supplementary material for: The Influence of Pelvic Tilt on Stress Distribution in the Acetabulum: Finite Element Analysis
Source: Research Square preprint supplement (doi:10.21203/rs.3.rs-109291/v1), 2020-11-30
Supplement: Supplementary file 2 [file 59223e10c3339d50a4428443.xlsx]

## Sheet: Sheet1
Table 1 material properties
Material	Young’s Modulus (E; MPa)	Poisson’s ratio
Pelvic bone	Keyak’s formula	0.25
Femoral bone	17000	0.3
Cartilage	15	0.45
